# Supplementary material
Source: PubMed Central journal article supplement (PMC3807487)
Supplement: JB.00373-13_zjb999092805so1.pdf [file JB.00373-13_zjb999092805so1.pdf]

**Supplemental Data**

**Functional characterization of core components of the *Bacillus subtilis* c-di-GMP signaling pathway**

Xiaohui Gao<sup>1,3</sup>, Sampriti Mukherjee<sup>2</sup>, Paige M. Matthews<sup>1</sup>, Loubna A. Hammad<sup>1</sup>, Daniel B. Kearns<sup>2</sup>, Charles E. Dann III<sup>1\*</sup>, Department of Chemistry<sup>1</sup>, Department of Biology<sup>2</sup> and Biochemistry Graduate Program<sup>3</sup> Indiana University, Bloomington, IN 47405-7102

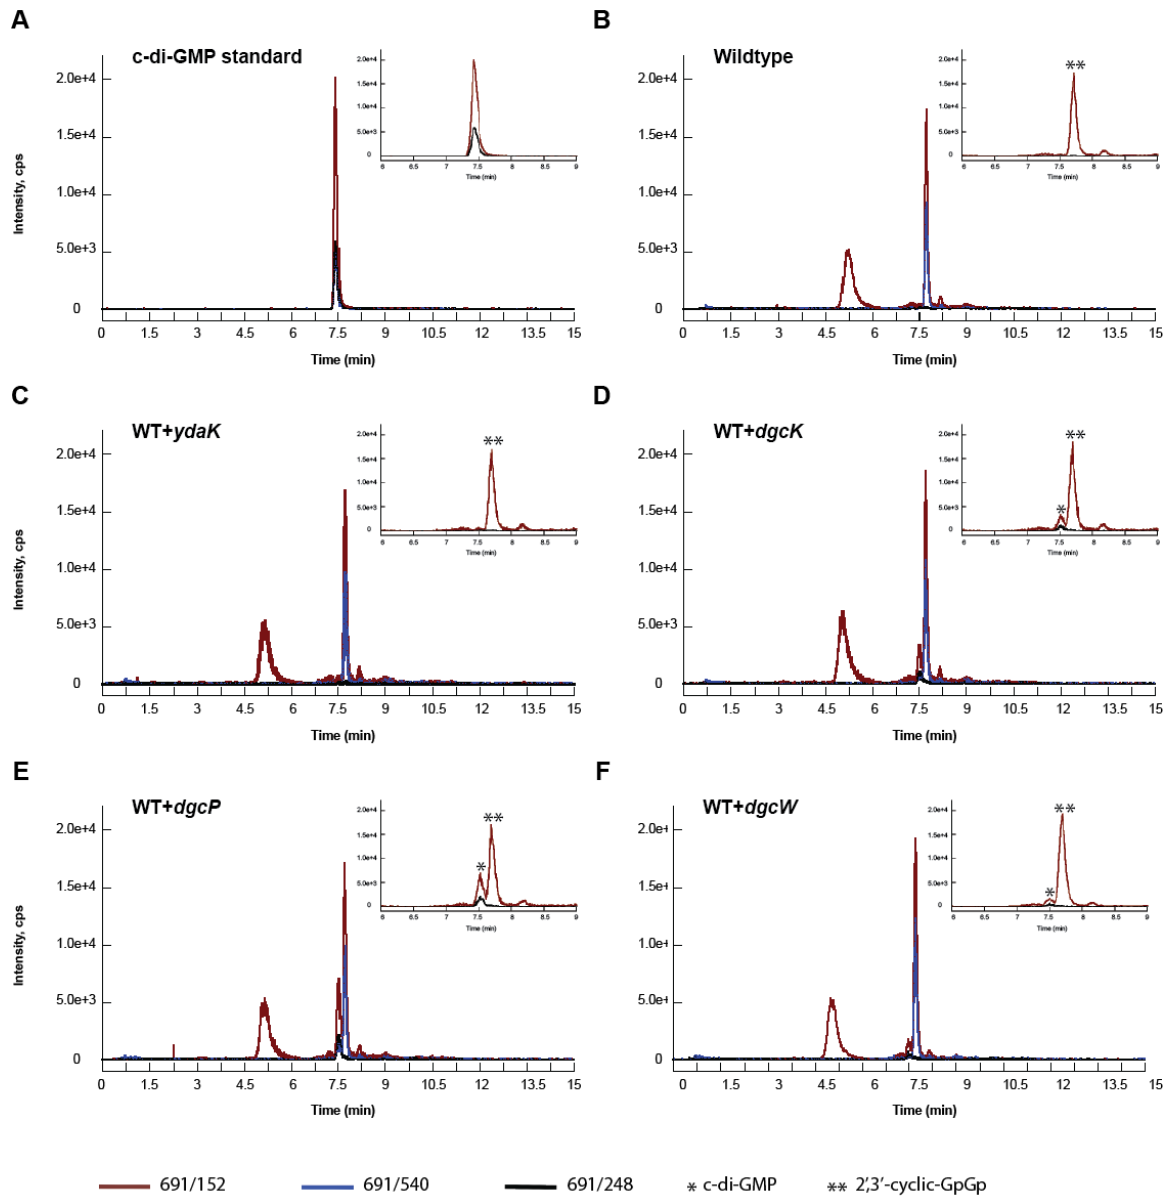

**FIG. S1. *In vivo* analysis of c-di-GMP production by putative DGCs in inducible expression strains derived from wild type *B. subtilis*.** All signals obtained from MRM transitions  $m/z$  691  $\rightarrow$  152 (red),  $m/z$  691  $\rightarrow$  540 (blue) and  $m/z$  691  $\rightarrow$  248 (black) via LC-MS/MS are displayed for (A) c-di-GMP standard and bacterial extracts of (B) wild type *B. subtilis* and strains expressing putative DGCs: (C) YdaK, (D) DgcK, (E) DgcP, and (F) DgcW. Transitions  $m/z$  691  $\rightarrow$  152 (red),  $m/z$  691  $\rightarrow$  540 (blue) are not unique to c-di-GMP in *B. subtilis* lysates. Only two transitions are shown in insets to indicate relative abundance of the unique identifier ( $m/z$  691  $\rightarrow$  248 in black) and the most abundant fragmentation product ( $m/z$  691  $\rightarrow$  152 in red).

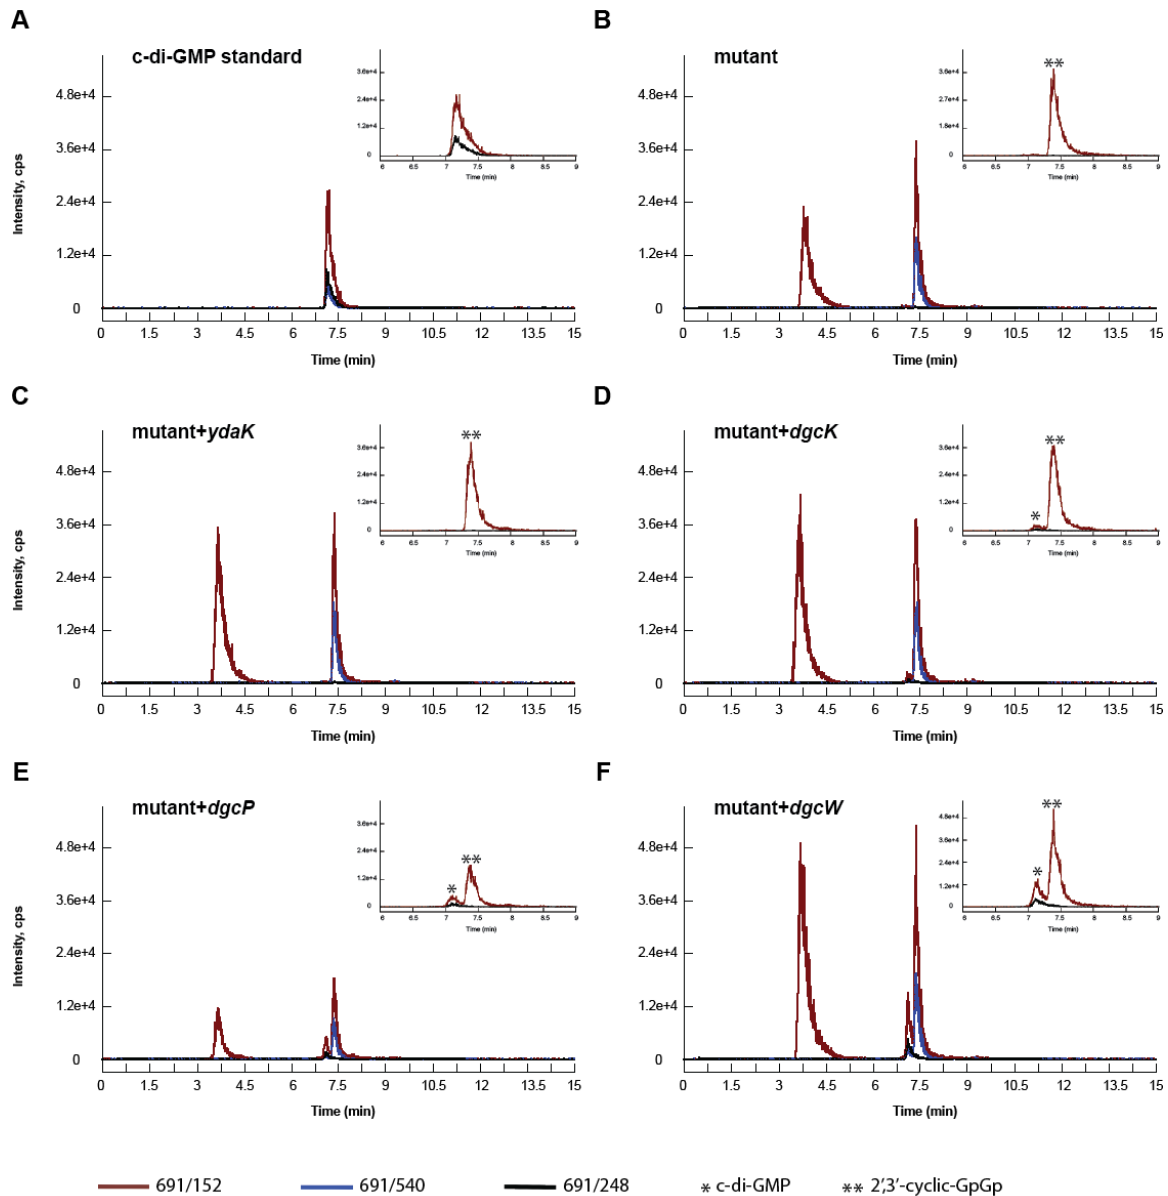

**FIG. S2. *In vivo* analysis of c-di-GMP production by putative DGCs in a background lacking all endogenous DGCs.** All signals obtained from MRM transitions  $m/z$  691  $\rightarrow$  152 (red),  $m/z$  691  $\rightarrow$  540 (blue) and  $m/z$  691  $\rightarrow$  248 (black) via LC-MS/MS are displayed for (A) c-di-GMP standard and bacterial extracts of (B)  $\Delta ydaK dgcK dgcW dgcP :: tet$  *B. subtilis* - labeled as mutant - and strains expressing putative DGCs: (C) YdaK, (D) DgcK (E) DgcP, and (F) DgcW. Transitions  $m/z$  691  $\rightarrow$  152 (red),  $m/z$  691  $\rightarrow$  540 (blue) are not unique to c-di-GMP in *B. subtilis* lysates. Only two transitions are shown in insets to indicate relative abundance of the unique identifier ( $m/z$  691  $\rightarrow$  248 in black) and the most abundant fragmentation product ( $m/z$  691  $\rightarrow$  152 in red).

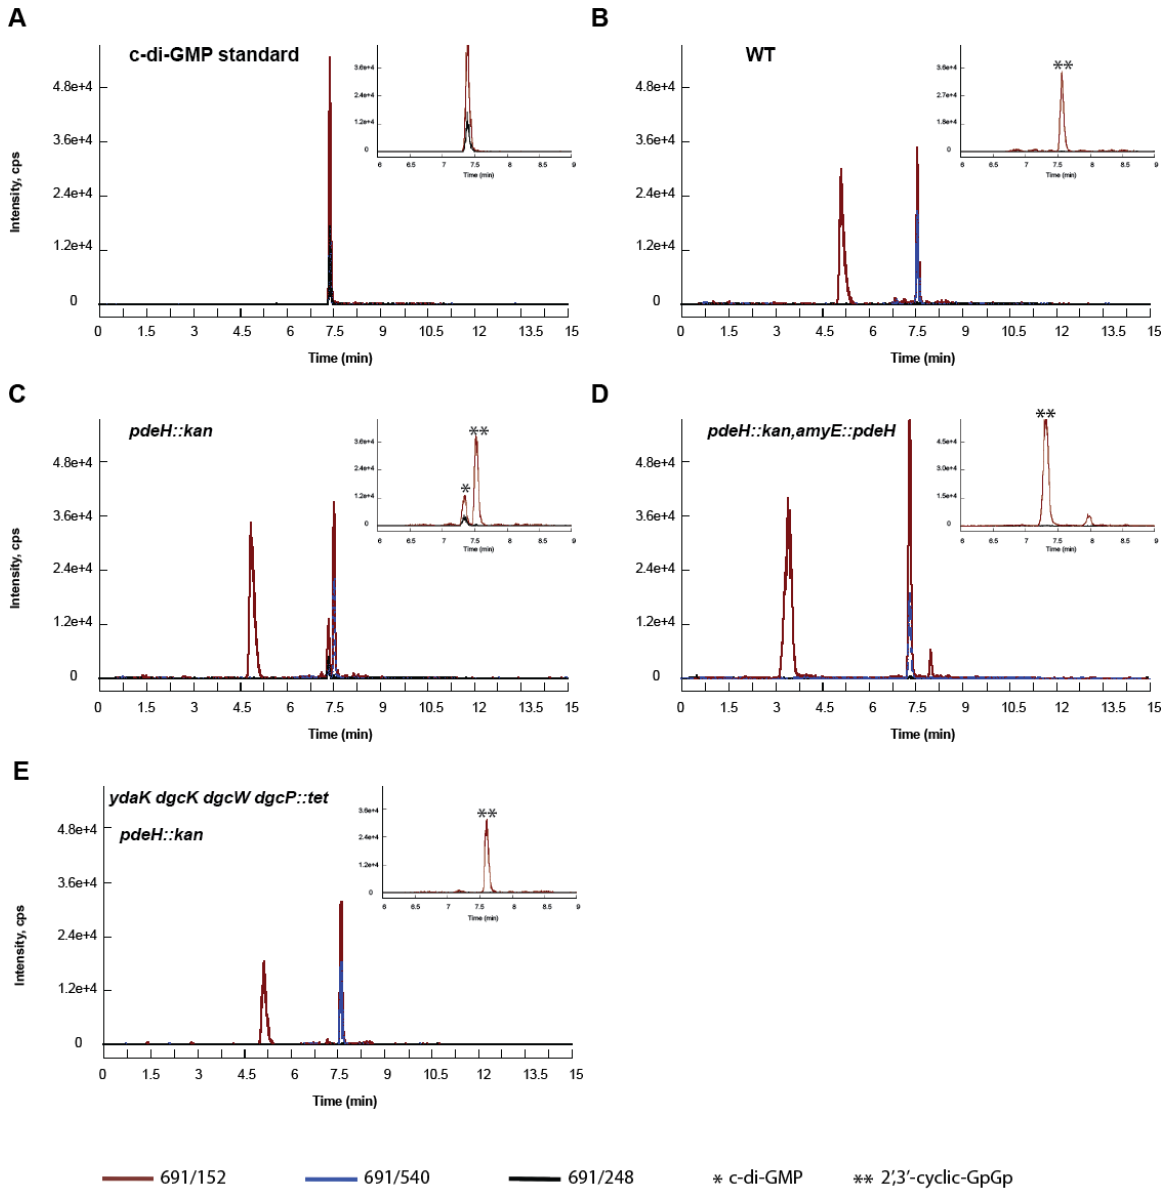

**FIG. S3. *In vivo* detection of c-di-GMP in knockout strains of PdeH, a c-di-GMP phosphodiesterase.** LC-MS/MS was used to detect c-di-GMP via the MRM transitions  $m/z$  691  $\rightarrow$  152 (red),  $m/z$  691  $\rightarrow$  540 (blue) and  $m/z$  691  $\rightarrow$  248 (black) for c-di-GMP standard (A) and *B. subtilis* extracts from the following strains: (B) wild type; (C)  $\Delta pdeH::kan$  lacking a putative c-di-GMP Phosphodiesterase; (D)  $\Delta pdeH::kan, amyE::pdeH$  showing active phosphodiesterase complementation and (E)  $\Delta ydaK dgcK dgcW dgcP::tet pdeH::kan$  lacking a putative c-di-GMP phosphodiesterase and all possible diguanylate cyclases. Transitions  $m/z$  691  $\rightarrow$  152 (red),  $m/z$  691  $\rightarrow$  540 (blue) are not unique to c-di-GMP in *B. subtilis* lysates. Only two transitions are shown in insets to indicate relative abundance of the unique identifier ( $m/z$  691  $\rightarrow$  248 in black) and the most abundant fragmentation product ( $m/z$  691  $\rightarrow$  152 in red).

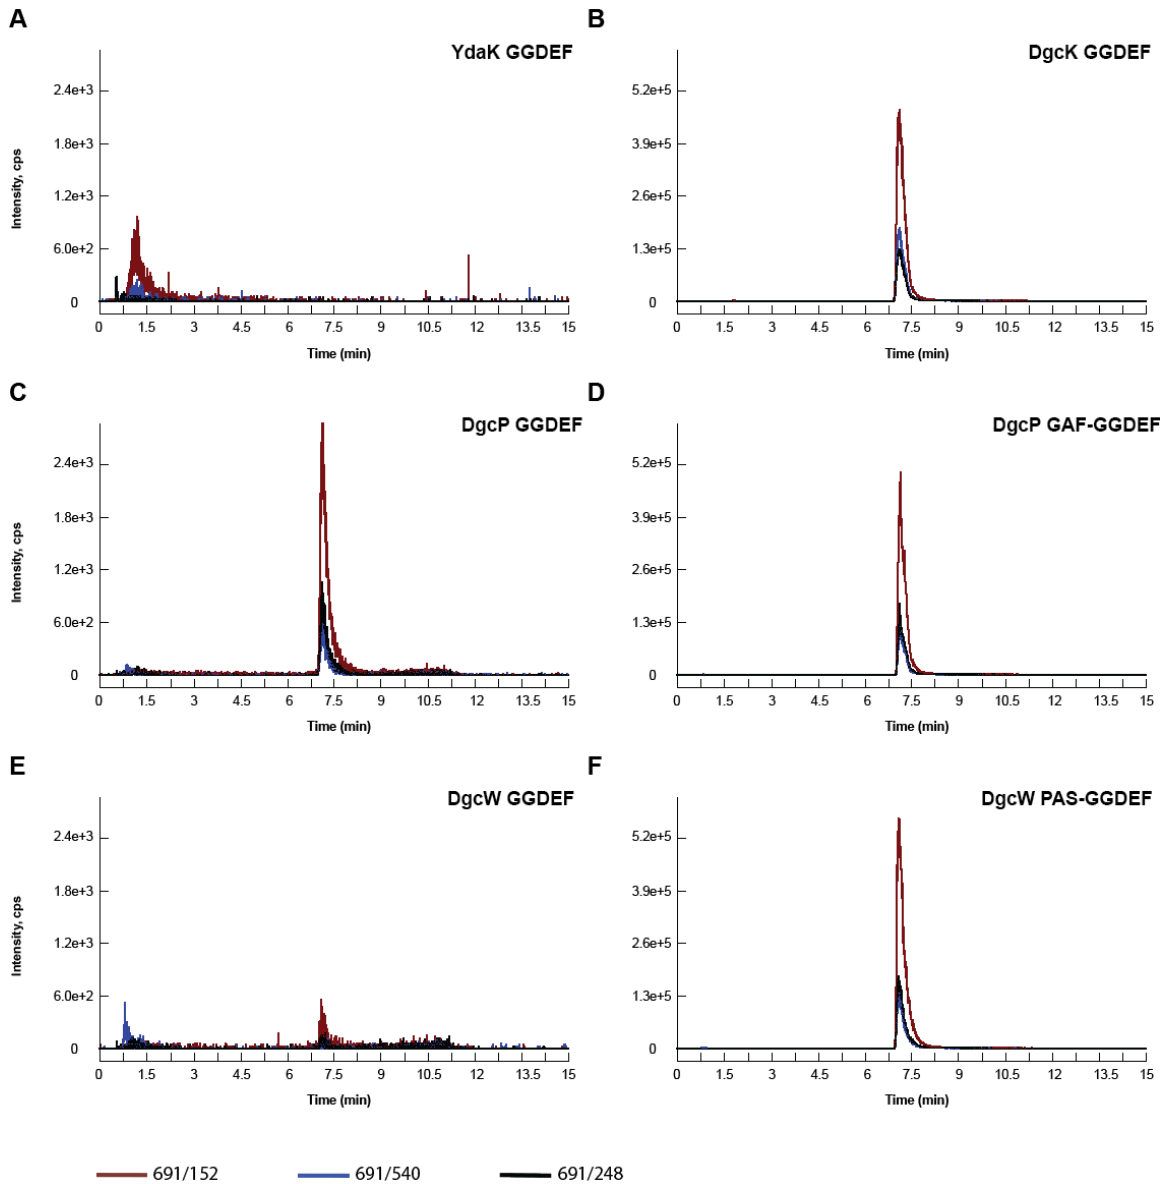

**FIG. S4. *In vitro* detection of enzymatic activity of putative *B. subtilis* DGCs.** To assess the activity of putative DGCs *in vitro*, LC-MS/MS was employed with MRM to detect enzymatic production of c-di-GMP from purified single or dual domain constructs containing GGDEF motifs. All ion peaks indicate production of c-di-GMP in *in vitro* assays. In total, four GGDEF single domain proteins were analyzed - (A) YdaK, (B) DgcK, (C) DgcP and (E) DgcW - as well as two dual domain constructs containing GGDEF and either GAF or PAS domains (D, F). As c-di-GMP co-purifies with the DgcK GGDEF protein exogenously expressed and purified from *E. coli*, uniformly labeled  $^{13}\text{C}$ ,  $^{15}\text{N}$ -GTP was used as a substrate for the DgcK GGDEF enzymatic reactions. For this isotope, the MRM transitions  $m/z$  721  $\rightarrow$  162 (red line),  $m/z$  721  $\rightarrow$  560 (blue line) and  $m/z$  721  $\rightarrow$  263 (black line) were utilized (B), which

corresponds to the  $m/z$  691  $\rightarrow$  152 (red),  $m/z$  691  $\rightarrow$  540 (blue) and  $m/z$  691  $\rightarrow$  248 (black) transitions used in all other cases.

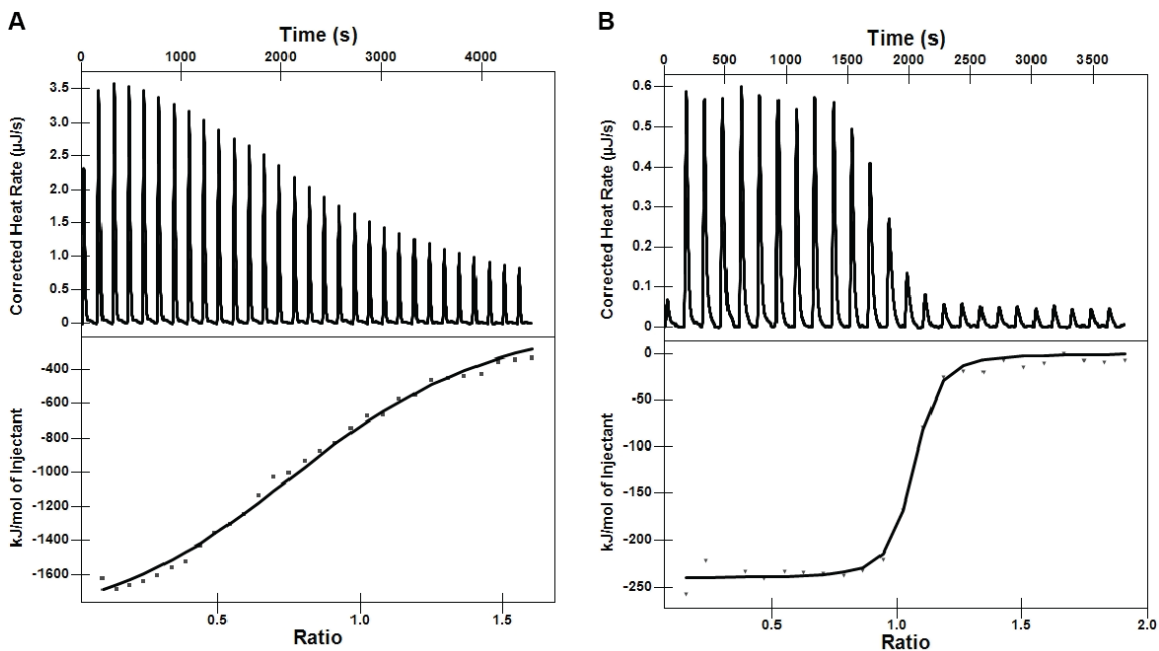

**FIG. S5. Measurement of binding affinities of c-di-GMP to (A) YdaK and (B) DgrA.** At least three titrations were carried out at 25 °C in each case with a single representative titration shown. The measured dissociation constant and standard deviations for c-di-GMP binding to YdaK and DgrA were  $1.1 \pm 0.2 \mu\text{M}$  and  $11.0 \pm 0.4 \text{ nM}$ , respectively. Buffer conditions: 10 mM sodium citrate phosphate, 200 mM NaCl, pH 7.5.

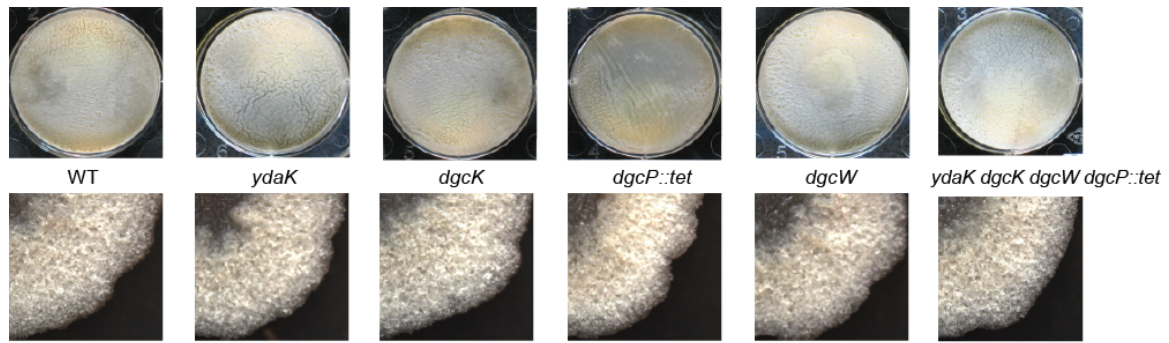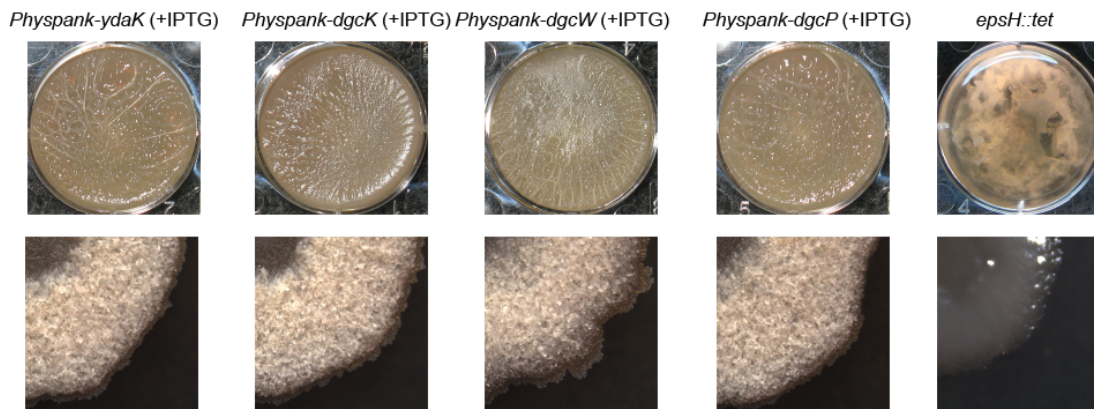

**FIG. S6. *B. subtilis* biofilm formation is unaffected by alterations in c-di-GMP signaling.** Strains with deletions or disruptions in any individual or all *B. subtilis* GGDEF protein(s) show no assembly defect in biofilm or pellicle formation assays, indicating c-di-GMP is not required for biofilm production (top two rows). Likewise, overexpression of each individual GGDEF protein does not alter biofilm or pellicle formation. The *epsH::tet* mutant is a control to illustrate a context in which these processes are disrupted.

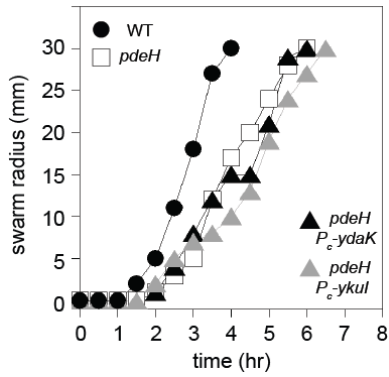

**FIG. S7. Swarm expansion assays of strains constitutively expressing YdaK or YkuI, potential c-di-GMP receptors, in a background containing elevated c-di-GMP levels (*pdeH*).** Swarming of *B. subtilis* 3610-wild type; DK391, a *pdeH* deletion; NPS265, a constitutive expression strain of *ykul* in *pdeH* background; and NPS266, a constitutive expression strain of *ydaK* in *pdeH* were shown. YkuI and YdaK do not act as c-di-GMP receptors involved in motility, as each protein does not inhibit motility when expressed in a background containing c-di-GMP (*cf. dgrA* in Fig 9Q). Each point is an average of three replicates.



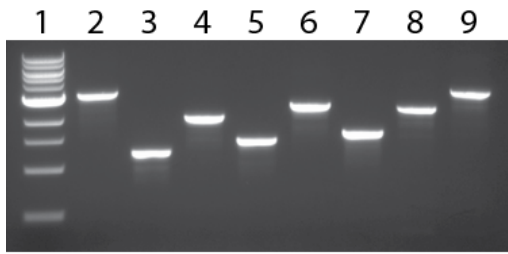

1. 1Kb DNA ladder
2. WT | Primer Pair 2928/2931
3.  $\Delta dgcW$  |
4. WT | Primer Pair 2932/2935
5.  $\Delta ydaK$  |
6. WT | Primer Pair 2936/2939
7.  $\Delta dgcK$  |
8. WT | Primer Pair 2924/2927
9.  $dgcP::tet$  |

**FIG. S8. PCR verification for *dgc* knockout mutants.** Primer pairs for amplification of wild type and mutant sequences are listed on the right.

**Table S1. *B. subtilis* strains used in this study**

| <b>Strain</b> | <b>Genotype</b>                                                                  |
|---------------|----------------------------------------------------------------------------------|
| 3610          |                                                                                  |
| DK391         | <i>pdeH::kan</i>                                                                 |
| DK392         | <i>ΔydaK ΔdgcK ΔdgcW dgcP::tet pdeH::kan</i>                                     |
| DK393         | <i>pdeH::kan dgrA::erm</i>                                                       |
| DK404         | <i>dgcP::tet pdeH::kan</i>                                                       |
| DK405         | <i>ΔdgcW pdeH::kan</i>                                                           |
| DK406         | <i>ΔydaK pdeH::kan</i>                                                           |
| DK407         | <i>ΔdgcK pdeH::kan</i>                                                           |
| DS4856        | <i>amyE::Physpank-dgcW spec</i>                                                  |
| DS4857        | <i>amyE::Physpank-dgcP spec</i>                                                  |
| DS4858        | <i>amyE::Physpank-ydaK spec</i>                                                  |
| DS4859        | <i>amyE::Physpank-dgcK spec</i>                                                  |
| DS9883        | <i>ΔdgcW</i>                                                                     |
| DS9289        | <i>ΔydaK</i>                                                                     |
| DS9305        | <i>ΔdgcK</i>                                                                     |
| DS9537        | <i>dgcP :: tet</i>                                                               |
| DS9408        | <i>ΔydaK ΔdgcK</i>                                                               |
| DS9544        | <i>ΔydaK dgcP::tet</i>                                                           |
| DS9545        | <i>ΔdgcK dgcP::tet</i>                                                           |
| DS9548        | <i>ΔydaK ΔdgcK dgcP::tet</i>                                                     |
| DS9884        | <i>ΔydaK ΔdgcK ΔdgcW dgcP::tet</i>                                               |
| NPS079        | <i>amyE::Physpank-dgcW spec ΔydaK ΔdgcK ΔdgcW dgcP::tet</i>                      |
| NPS080        | <i>amyE::Physpank-dgcP spec ΔydaK ΔdgcK ΔdgcW dgcP::tet</i>                      |
| NPS081        | <i>amyE::Physpank-ydaK spec ΔydaK ΔdgcK ΔdgcW dgcP::tet</i>                      |
| NPS082        | <i>amyE::Physpank-dgcK spec ΔydaK ΔdgcK ΔdgcW dgcP::tet</i>                      |
| NPS207        | <i>amyE::Physpank-dgcW ΔEAL spec , ΔydaK ΔdgcK ΔdgcW dgcP::tet</i>               |
| NPS208        | <i>amyE::Physpank-dgcK GGGGF mutant spec, ΔydaK ΔdgcK ΔdgcW dgcP::tet</i>        |
| NPS209        | <i>amyE::Physpank-dgcP GGGGL mutant spec, ΔydaK ΔdgcK ΔdgcW dgcP::tet</i>        |
| NPS215        | <i>amyE::Physpank-dgcK GGAAF mutant spec, ΔydaK ΔdgcK ΔdgcW dgcP::tet</i>        |
| NPS216        | <i>amyE::Physpank-dgcP GGAAL mutant spec, ΔydaK ΔdgcK ΔdgcW dgcP::tet</i>        |
| NPS217        | <i>dgrA :: erm mls</i>                                                           |
| NPS218        | <i>dgrA :: erm mls, ΔydaK ΔdgcK ΔdgcW dgcP::tet</i>                              |
| NPS219        | <i>amyE::Physpank-dgcP spec , dgrA :: erm mls ΔydaK ΔdgcK ΔdgcW dgcP::tet</i>    |
| NPS220        | <i>amyE::Physpank-dgcK spec, dgrA :: erm mls ΔydaK ΔdgcK ΔdgcW dgcP::tet</i>     |
| NPS221        | <i>amyE::Physpank-dgcW ΔEAL spec dgrA :: erm mls ΔydaK ΔdgcK ΔdgcW dgcP::tet</i> |
| NPS224        | <i>amyE::Physpank-dgcW PAS-GGAAF ΔEAL spec ΔydaK ΔdgcK ΔdgcW dgcP::tet</i>       |
| NPS233        | <i>amyE:: pdeH cat, pdeH::kan</i>                                                |
| NPS235        | <i>amyE::Pconstitutive-dgrA spec, pdeH::kan</i>                                  |
| NPS236        | <i>amyE::Pconstitutive-dgrA spec, pdeH::kan, ΔydaK ΔdgcK ΔdgcW dgcP::tet</i>     |

NPS247 *thrc::Physpank-dgcP mls, amyE::Pconstitutive-dgrA spec, pdeH::kan, ΔydaK ΔdgcK ΔdgcW dgcP::tet*

NPS252 *thrc::Physpank-Bs\_dgcP -dcpA mls, amyE::Pconstitutive-dgrA spec, pdeH::kan, ΔydaK ΔdgcK ΔdgcW dgcP::tet*

NPS254 *thrc::Physpank-Bs\_dgcP -cd1420 mls, amyE::Pconstitutive-dgrA spec, pdeH::kan, ΔydaK ΔdgcK ΔdgcW dgcP::tet*

NPS255 *thrc::Physpank-Bs\_dgcP -Atu1297 mls, amyE::Pconstitutive-dgrA spec, pdeH::kan, ΔydaK ΔdgcK ΔdgcW dgcP::tet*

NPS265 *amyE::Pconstitutive-YkuI spec, pdeH::kan*

NPS266 *amyE::Pconstitutive-YdaK spec, pdeH::kan*

---

**Table S2 Plasmids used in this study**

---

| Plasmid       | Genotype/reference                                                    |
|---------------|-----------------------------------------------------------------------|
| pAH25         | <i>amyE::spec amp</i> (gift from Dr. Amy Camp, Mount Holyoke College) |
| pAH52         | <i>erm amp</i>                                                        |
| pDG1515       | <i>tet amp</i> (Guérout-Fleury et al., 1995)                          |
| pDG364        | <i>amyE cat</i>                                                       |
| pDP150        | <i>thrc_ Physpank mls</i>                                             |
| pDP391        | $\Omega\Delta dgcW$ <i>mls amp</i>                                    |
| pDP392        | $\Omega\Delta ydaK$ <i>mls amp</i>                                    |
| pDP393        | $\Omega\Delta dgcK$ <i>mls amp</i>                                    |
| pDP407        | <i>ypfA::erm amp</i>                                                  |
| pDR90         | <i>amyE::Phyrespac spec amp</i> (gift from Dr. David Rudner, Harvard) |
| pDR111        | <i>amyE intergration vector that contains Physpank, spec and amp</i>  |
| pHis-parallel | N-terminal His-tag expression vector <i>amp</i>                       |
| pKB149        | <i>amyE_Pconstitutive spec</i>                                        |
| pMiniMAD      | <i>ori<sup>BsTs</sup> mls</i> (Patrick and Kearns, 2008)              |
| pMBP-parallel | N-terminal MBP-tag expression vector <i>amp</i>                       |
| pHS001        | <i>pHis-parallel with pdeH, amp</i>                                   |
| pXG075        | <i>pHis-parallel with ydaK GGDEF domain, amp</i>                      |
| pXG076        | <i>pHis-parallel with dgcK GGDEF domain, amp</i>                      |
| pXG061        | <i>pMBP-parallel with dgcP GGDEF domain, amp</i>                      |
| pXG074        | <i>pHis-parallel with dgcP GAF-GGDEF domain, amp</i>                  |
| pXG077        | <i>pMBP-parallel with dgcW GGDEF domain, amp</i>                      |
| pXG079        | <i>pHis-parallel with dgcW PAS-GGDEF domain, amp</i>                  |
| pXG001        | <i>amyE::Physpank-dgcW, spec</i>                                      |
| pXG002        | <i>amyE::Physpank-dgcP, spec</i>                                      |
| pXG003        | <i>amyE::Physpank-ydaK, spec</i>                                      |
| pXG004        | <i>amyE::Physpank-dgcK, spec</i>                                      |
| pXG085        | <i>pHis-parallel with dgrA, amp</i>                                   |
| pXG086        | <i>amyE::Physpank-dgcW <math>\Delta</math>EAL, spec</i>               |
| pXG087        | <i>amyE::Physpank-dgcK GGGGF mutant, spec</i>                         |
| pXG088        | <i>amyE::Physpank-dgcP GGGGL, spec</i>                                |
| pXG090        | <i>amyE::Physpank-dgcK GGAAF, spec</i>                                |
| pXG091        | <i>amyE::Physpank-dgcK GGAAF, spec</i>                                |
| pXG092        | <i>amyE::Physpank-dgcW GGAAF <math>\Delta</math>EAL, spec</i>         |
| pXG093        | <i>pHis-parallel with dgrA C4, amp</i>                                |
| pXG094        | <i>amyE:: pdeH, cat (complementation)</i>                             |
| pXG095        | <i>amyE::Pconstitutive-dgrA, spec</i>                                 |
| pXG100        | <i>thrc::Physpank-dgcP, mls</i>                                       |
| pXG101        | <i>thrc::Physpank-dgcP, mls</i>                                       |
| pXG102        | <i>thrc::Physpank-dgcP-dcpA, mls</i>                                  |
| pXG104        | <i>thrc::Physpank-dgcP-CD1420, mls</i>                                |
| pXG105        | <i>thrc::Physpank-dgcP-Atu1297, mls</i>                               |

---

---

|        |                                       |
|--------|---------------------------------------|
| pXG124 | <i>amyE::Pconstitutive-ykuI, spec</i> |
| pXG125 | <i>amyE::Pconstitutive-ydaK, spec</i> |

---

**Table S3 Primers used in this study**

---

| <b>Primers for enzymatic activity assays <i>in vitro</i></b>              |                          |                                                                                   |
|---------------------------------------------------------------------------|--------------------------|-----------------------------------------------------------------------------------|
| GXH466                                                                    | YdaK GGDEF domain(NcoI)  | ggg ccatgg atcacgatattacagcagag                                                   |
| GXH460                                                                    | YdaK GGDEF domain(EcoRI) | ggg gaattc ttatagttcattcatcatcatctcgtttcc                                         |
| GXH467                                                                    | DgcK GGDEF domain (NcoI) | ggg ccatgg atcatgaaacaaatgcac                                                     |
| GXH462                                                                    | DgcK GGDEF domain(EcoRI) | ggg gaattc tcattcttttttctgaaaaacacactctg                                          |
| GXH454                                                                    | DgcP GGDEF (NcoI)        | ggg ccatgg tgaaaacagatcagctgactg                                                  |
| GXH440                                                                    | DgcP GGDEF(EcoRI)        | ggg gaattc tcatgagtcgatgaatcatcaagcg                                              |
| GXH465                                                                    | DgcP GAF-GGDEF (NcoI)    | ggg ccatgg atcaggaaagactctataac                                                   |
| GXH458                                                                    | DgcP GAF-GGDEF(EcoRI)    | ggg gaattc ttattttattgagtcgatgaatcatcaagcgg                                       |
| GXH453                                                                    | DgcW GGDEF (NcoI)        | ggg ccatgg ctcatatgattcgttacagac                                                  |
| GXH471                                                                    | DgcW GGDEF (EcoRI)       | ggc gaattc ttaagaatagatctgtatttgctttg                                             |
| GXH464                                                                    | DgcW PAS-GGDEF (stul)    | gggaa aggcct aatattgatgcaattttatt                                                 |
| GXH468                                                                    | DgcW PAS-GGDEF (SpeI)    | ggc actagt ttaagaatagatctgtatttgctttg                                             |
| GXH480                                                                    | PdeH (NcoI)              | gggg ccatgg gaagggtgtttgtgcaagacag                                                |
| GXH481                                                                    | PdeH (EcoRI)             | gggg gaattc tcattttgcgtccataagattatgacac                                          |
| GXH482                                                                    | DgrA(NcoI)               | ggg ccatgg gaatagagattggagaaaatgtacttttag                                         |
| GXH483                                                                    | DgrA (EcoRI)             | gggg gaattc ttattccattcgggcctttctc                                                |
| GXH513                                                                    | DgrA (EcoRI)             | gggg gaattc ttactttcttcttatttaactggcgc                                            |
| <b>Primers for overexpression/ constitutive expression <i>in vivo</i></b> |                          |                                                                                   |
| GXH301                                                                    | dgcWF (Sall)             | aggaggctgcagctcaacaagactggaacacacgat                                              |
| GXH302                                                                    | dgcWR (NheI)             | ctcctgctagcaaggagtacgattcatgtgtagtaa                                              |
| GXH303                                                                    | dgcPF(NheI)              | aggaggctagcgttcaccgtttatgatataataaac                                              |
| GXH304                                                                    | dgcPR(SphI)              | ctcctgcatgacgacgaaattgatgaaaaatacttaact                                           |
| GXH305                                                                    | ydaKF(NheI)              | aggaggctagcacgcattcatttgacaatctgctg                                               |
| GXH306                                                                    | ydaKR(SphI)              | ctcctgcatgcaatagaagcatcatgacgcatagc                                               |
| GXH307                                                                    | dgcKF(HindIII)           | aggagaagctttccgatgggtcaagtgcgaatt                                                 |
| GXH308                                                                    | dgcKR(NheI)              | ctcctgctagcaagaatatcagggagatcttgctc                                               |
| GXH516                                                                    | dgrAF (SphI)             | gggg gcatgcgtgagtatattgaatgcgaaagagtgaag                                          |
| GXH517                                                                    | dgrAR (BamHI)            | gggg ggatccggaagtgttgccgatgtttatcc                                                |
| GXH532                                                                    | dgcP (HindIII)           | attgtgagcggataacaattaagcttgcttcaccgtttatgatata<br>ataaac                          |
| GXH533                                                                    | dgcP (SphI)              | cgtttccaccgaattagcttgcatgacgacgaaattgatgaaaaat<br>acttaact                        |
| GXH534                                                                    | dgcP(-60~+3)             | attgtgagcggataacaattaagc<br>tttattatatacaaaacggtgaagcaagcttaattgttatccgctca<br>ca |
| GXH535                                                                    | dgcP (-60~+3)            | ttgcttcaccgtttatgatataataaacaataattagtggttaaact<br>ttagtg                         |
| GXH536                                                                    | dgcP (-60~+3)            | cactagtgctagccatgtttttatcacctaaaagttaccactaatt<br>ttg                             |
| GXH537                                                                    | dgcP (-60~+3)            | ttg                                                                               |
| GXH538                                                                    | dgcP (-60~+3)            | ataaaaacatggctagcactagtcgatgcaagctaattcgggtgga                                    |

---

---

|        |                |                                                                               |
|--------|----------------|-------------------------------------------------------------------------------|
| GXH539 | dgcP (-60~+3)  | gacctcgtttccaccgaattagcttgc<br>tggtaaacttttaggtgataaaaacatggctagcattagatattca |
| GXH540 | dcpA (NheI)    | actcgtccccatcct<br>cgtttccaccgaattagcttgcgctggtcgtgaggaagcccaaa               |
| GXH521 | dcpA (SphI)    | aaggatgaag<br>tggtaaacttttaggtgataaaaacatggctagctttaaagaatt                   |
| GXH542 | CD1420 (NheI)  | ttttaagaactttccagga<br>gacctcgtttccaccgaattagcttgcgctgcatgtacaagttaaaa        |
| GXH543 | CD1420 (SphI)  | aaagaaagataattttaatt<br>tggtaaacttttaggtgataaaaacatggctagcagggcgagagt         |
| GXH544 | Atu1297 (NheI) | tctggtgttgac<br>cgtttccaccgaattagcttgcgagaggctgcgcaaacagtc                    |
| GXH531 | Atu1297 (SphI) | gtggttaa                                                                      |
| GXH583 | ykuI (SphI)    | ggg gcatgc gtgcgtataatcagacaaagatagagaagc                                     |
| GXH584 | ykuI (NheI)    | ggg gctagc aaacggcctttcagccgttaaatc                                           |
| GXH585 | ydaK(SphI)     | ggg gcatgc cacgattcatttgacaatctgctg                                           |
| GXH586 | ydaK(NheI)     | ggg gctagc aatagaagcatcatgacgcatagc                                           |

### Primers for gene knockouts and complementation *in vivo*

|        |                            |                                      |
|--------|----------------------------|--------------------------------------|
| 2006   |                            | cgccattcgccagggtgcag                 |
| 2007   |                            | ctcctgcatgcacacacattatgccacaccttgtag |
| 2928   | dgcWUF (EcoRI)             | aggaggaattcatcctgccaacaacgccca       |
| 2929   | dgcWUR (XhoI)              | ctcctctcgagatattccatcggcatttccat     |
| 2930   | dgcWDF (XhoI)              | aggagctcgaggtgattgccgaagggtgtgg      |
| 2931   | dgcWDR (BamHI)             | ctcctggatcccagggtataggccttcgt        |
| 2932   | ydaKUF (EcoRI)             | aggaggaattcgtctttgaagacatacaaatatg   |
| 2933   | ydaKUR (XhoI)              | ctcctctcgagcagagcaccttctgattgct      |
| 2934   | ydaKDF (XhoI)              | aggagctcgagggaaagtatgtgtcgcttacg     |
| 2935   | ydaKDR (BamHI)             | ctcctggatccctctgagctgttccgccac       |
| 2936   | dgcKUF(EcoRI)              | aggaggaattctcgttgaagtgcggtctagctc    |
| 2937   | dgcKUR (XhoI)              | ctcctctcgagtactagcctttctttaaacagg    |
| 2938   | <i>dgcK</i> DF (XhoI)      | aggagctcgagcttgccgatcaaatgctttac     |
| 2939   | <i>dgcK</i> DR (BamHI)     | ctcctggatcctcgggattgctgagctgac       |
| 3037   | <i>dgcP</i> UP F 3 (BamHI) | aggagggatccgtctgctctattcgaccatg      |
| 3038   | <i>dgcP</i> UP R 3 (PstI)  | ctcctctgcaggcagcaagatggaaacgc        |
| 3039   | <i>dgcP</i> DN F 3 (EcoRI) | aggaggaattcacgtacggccatcagactg       |
| 3040   | <i>dgcP</i> DN R 3 (XhoI)  | ctcctctcgagcagaaattgtgcttccgattc     |
| GXH489 | <i>dgrA</i> UPF (EagI)     | aggagcggccggaacaggaagcaaaacaaattg    |
| GXH490 | <i>dgrA</i> UPR (BamHI)    | ctcctggatccgtacattttctccaatctctatc   |
| GXH491 | <i>dgrA</i> DNF (XhoI)     | aggagctcgagcaggcttcttcaatactgc       |
| GXH492 | <i>dgrA</i> DNR (KpnI)     | ctcctggtacctctgcatttggcagcacatg      |
| 3428   | <i>pdeH_kan</i> ITA UP F   | ggaaagcgtttaatatcccc                 |

---

---

|        |                               |                                                                |
|--------|-------------------------------|----------------------------------------------------------------|
| 3429   | <i>pdeH_kan</i> ITA UP R      | caattcgcctatagtgagtcgtacaaacaccctcattgatttatc                  |
| 3430   | <i>pdeH_kan</i> ITA DN F      | ccagcttttgtcccttagtgagatggacgcaaaatgattgcgg                    |
| 3431   | <i>pdeH_kan</i> ITA DN R      | ggacatttaaaggacagcagg                                          |
| GXH514 | <i>pdeH</i> complementation F | tgataagctgtcaaacatgagaattcgaaagaaagtctaccgca<br>ttattaatcagtcc |
| GXH515 | <i>pdeH</i> complementation R | atggtagcgaccggcgctcaggatcctttgcggtggtcagagga<br>ccgc           |

**Primers for DGC mutants *in vivo***

|        |                                |                                                           |
|--------|--------------------------------|-----------------------------------------------------------|
| GXH484 | <i>dgcW</i> in vivo truncation | cttc gctagc ttaagaatagtatctgtatttgcttttg                  |
| GXH485 | <i>dgcK</i> GGGGF mutant       | gatcctgccgctcggatcggcggtggcggtttgcccgtgctcctg<br>ccgaactg |
| GXH486 | <i>dgcK</i> GGGGF mutant       | cagttcggcaggagcacggcaaaaccgccaccgccgatccga<br>gcggcaggatc |
| GXH487 | <i>dgcP</i> GGGGL mutant       | cggtgcccgtggggaggaggaggactggcgatttattgccaa<br>atgtgccg    |
| GXH488 | <i>dgcP</i> GGGGL mutant       | cggcacatttgcaataaatcgccagtcctcctcctcccagcg<br>ggcaccg     |
| GXH495 | <i>dgcK</i> GGAAF mutant       | gatcctgccgctcggatcggcggtgccgctttgcccgtgctcctg<br>ccgaactg |
| GXH496 | <i>dgcK</i> GGAAF mutant       | cagttcggcaggagcacggcaaaagcggcaccgccgatccga<br>gcggcaggatc |
| GXH497 | <i>dgcP</i> GGAAL mutant       | cggtgcccgtggggaggagccgccctggcgatttattgccaa<br>atgtgccg    |
| GXH498 | <i>dgcP</i> GGAAL mutant       | cggcacatttgcaataaatcgccagggcggtcctcccagc<br>gggcaccg      |
| GXH499 | <i>dgcW</i> GGAAF $\Delta$ EAL | ccgtcttggcggtgctgcatttattattattaac                        |
| GXH500 | <i>dgcW</i> GGAAF $\Delta$ EAL | gttaataataataaatgcagcaccgcccaagacgg                       |

---
